# Supplementary material for: Culturally Relevant Inquiry-Based Laboratory Module Implementations in Upper-Division Genetics and Cell Biology Teaching Laboratories
Source: Atypon-hosted journal article supplement (doi:10.1187/cbe.11-04-0035), 2011-09-01
Supplement: combinedsupmats.pdf [file combinedsupmats.pdf]

1 ADDITIONAL INFORMATION

2

3 File 1: Cassava sample collection form used to collect and store samples.

*Biol3300: Genetics Course  
Department of Biology  
University of Puerto Rico Mayaguez*

**FOR THE TEACHING ASSISTANT**

Name of TA: \_\_\_\_\_

Email of TA: \_\_\_\_\_

Date Received: \_\_\_\_\_

Lab section#: 3300L-\_\_\_\_\_ Sample#: \_\_\_\_\_

**FOR THE SIRTUNGA LAB**

Official #: \_\_\_\_\_

**CASSAVA SAMPLE COLLECTION FORM (Fall 2009)**

**PERSONAL INFORMATION**

Your Name: \_\_\_\_\_ ID #: \_\_\_\_\_

Email: \_\_\_\_\_ Telephone: \_\_\_\_\_

Major: \_\_\_\_\_ Level: 1<sup>st</sup> year / 2<sup>nd</sup> year / 3<sup>rd</sup> year / 4<sup>th</sup> year / other \_\_\_\_\_

**SAMPLE COLLECTION SITE INFORMATION (if available)**

Name of land owner: \_\_\_\_\_ Telephone: \_\_\_\_\_

Barrio/Sector: \_\_\_\_\_ Municipality: \_\_\_\_\_

Coordinates (GPS) \_\_\_\_\_ Date of Collection: \_\_\_\_\_

Is this sample from a commercial farm (yes/no)? \_\_\_\_\_

Detailed directions to the site and Address: \_\_\_\_\_  
\_\_\_\_\_  
\_\_\_\_\_

**Mark the location of collection site clearly on the map in the reverse side.**

**SAMPLE INFORMATION:**

Approx. height of the plant: \_\_\_\_\_ Approx. age of the plant: \_\_\_\_\_

Number of nodes in the plant: \_\_\_\_\_ Which node (from top) is the sample you collected: \_\_\_\_\_

What is the local name of this variety: \_\_\_\_\_

Did you place the sample in a zip lock bag immediately: \_\_\_\_\_ Did you place the sample at 4°C: \_\_\_\_\_

**ADDITIONAL COMMENTS** (disease, toxicity, tastes, long-lasting, where is this cassava from, other stories about this cassava etc): \_\_\_\_\_

4

5

6

7

1 ADDITIONAL INFORMATION

2

3 File 2: Modified DNA extraction protocol, based on Dellaporta *et al.* (1983), used in the  
4 genetics module.

5

**Step**

**Protocol**

- 1 Take a half piece of leaf, place in 1.5ml tube. Label the tube with sample #. Add a tip of sand and grind for no more than 3 minutes with a blue pestle.
- 2 Add 500 µl of buffer, grind furthermore for 1 minute.
- 3 Add 50 µl of SDS 20% and mix by inversion.
- 4 Incubate at 65°C for 8 minutes in a water bath.
- 5 Add 250µl of cold (-20°C) 5M of Potassium Acetate and mix by inversion.
- 6 Incubate at -20°C for 5 minutes.
- 7 Centrifuge at maxim speed (~13000rpm) for 3 minutes. Transfer the supernatant to new tube. Label the tube with sample #.
- 8 Add 500 µl cold isopropanol to the supernatant and mix gently by inversion.
- 9 Incubate the samples for 5 min at -20°C.
- 10 Centrifuge 3 min in maxim (~13,000rpm). Discard supernatant.
- 11 Leave the pellet drying for 5 minutes at room temperature.
- 12 Add 700µl of 70% Ethanol to the pellet and mix gently.
- 13 Centrifuge 3 minutes max speed (~13,000rpm). Discard the supernatant.
- 14 Leave the pellet drying for 5 min.
- 15 Add 150 µl TE (10:1) and 2.25 µl of RNAase to the pellet.
- 16 Incubate for 5 min at 65°C in a water bath.
- 17 Re-label the tube with sample name and place the tube with DNA at 4°C.

6

7

8

1 ADDITIONAL INFORMATION

2 File 3: Gains in content knowledge during pilot implementation of the genetics module.  
 3 Assessment of knowledge gained by students was measured through pre- and post-  
 4 module assessments in a pilot section (n=22) and a control section (n=22). Both sections  
 5 were taught by the same teaching assistant. Percentage correct per questions in the  
 6 pre-module (gray columns) and post-module (black columns) assessment are shown.  
 7 The last horizontal bars show the overall percentages. The overall scores in the post  
 8 test were higher (\*p<0.01), as determined using an unpaired *t* test, in the pilot section  
 9 compared to the control section. GCQ refers to 'Genetics Content Question'.

10

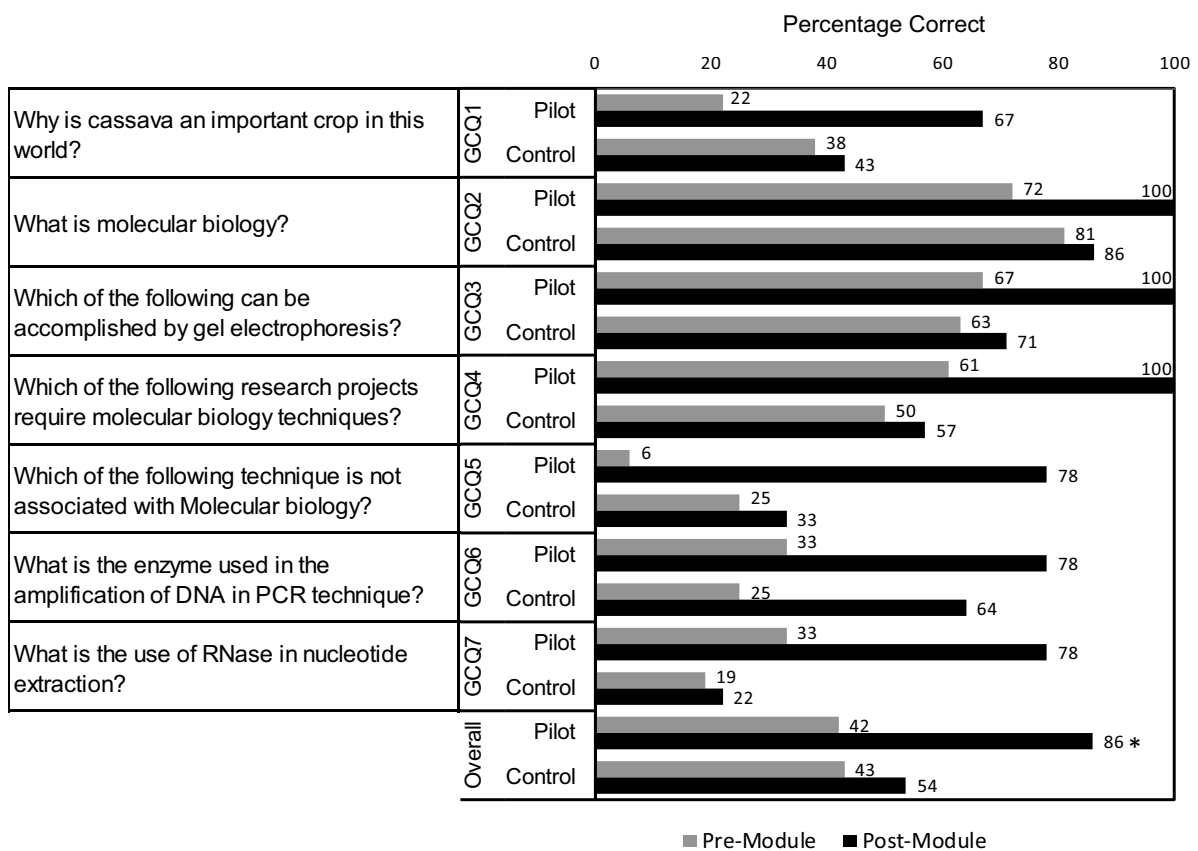

11
